# Supplementary material for: Whole-Genome Sequence Analysis of Candida glabrata Isolates from a Patient with Persistent Fungemia and Determination of the Molecular Mechanisms of Multidrug Resistance
Source: MDPI journal article supplement (doi:10.3390/jof9050515), 2023-04-26
Supplement: s1 [file s1]

**Supplementary Table S1.** The list of possible genes associated with antifungal resistance in *C. glabrata*

| Possible antifungal resistance genes |              |              |              |              |       |       |        |        |        |      |
|--------------------------------------|--------------|--------------|--------------|--------------|-------|-------|--------|--------|--------|------|
| ADA2                                 | CAGL0B03355g | CAGL0G07689g | CAGL0K03377g | CAGL0L10318g | EPA3  | FCY2  | INO1   | PDR13  | SSD1   | YOR1 |
| ADH1                                 | CAGL0B03421g | CAGL0G09273g | CAGL0K04301g | CAGL0L10604g | ERG1  | FEN1  | IPC1   | PFK1   | STB5   | YPS5 |
| ADK1                                 | CAGL0C02981g | CAGL0G09603g | CAGL0K05995g | CAGL0L10736g | ERG2  | FKS1  | JJJ1   | PGK1   | STR3   |      |
| AHP1                                 | CAGL0D00946g | CAGL0H02387g | CAGL0K08866g | CAGL0M01870g | ERG3  | FKS2  | MEC3   | PUP1   | SUR2   |      |
| AMT1                                 | CAGL0D06512g | CAGL0H05181g | CAGL0K09460g | CAGL0M04631g | ERG4  | FKS3  | MET8   | PYC1   | SUR4   |      |
| AP1                                  | CAGL0E00803g | CAGL0H06809g | CAGL0K09702g | CAGL0M05005g | ERG5  | FLR1  | MGE1   | QDR2   | SUT1   |      |
| AQR1                                 | CAGL0E01353g | CAGL0H08866g | CAGL0K10934g | CAGL0M07766g | ERG6  | FLR2  | MSH2   | ROX1   | TDH3   |      |
| ATF2                                 | CAGL0E04554g | CAGL0I01980g | CAGL0K11616g | CAGL0M08426g | ERG7  | FPS1  | MT-II  | RPN4   | TOG1   |      |
| BMT2                                 | CAGL0E04576g | CAGL0I02464g | CAGL0K12100g | CAGL0M09713g | ERG8  | FPS2  | NCE103 | RSB1   | TPO1_1 |      |
| BRE5                                 | CAGL0F04917g | CAGL0I04422g | CAGL0K12958g | CAGL0M10219g | ERG9  | GAS1  | NDT80  | RTA1   | TPO1_2 |      |
| CAGL0A01650g                         | CAGL0F05467g | CAGL0I07249g | CAGL0L01485g | CAGL0M12749g | ERG10 | GLN3  | NOP8   | RTT106 | TPO3   |      |
| CAGL0A02816g                         | CAGL0F06897g | CAGL0I07645g | CAGL0L02211g | CAGL0M12925g | ERG11 | GPD2  | NUD1   | SDH2   | TPO4   |      |
| CAGL0A04169g                         | CAGL0F07117g | CAGL0I10604g | CAGL0L03135g | CAGL0M14047g | ERG13 | HAL9  | OCH1   | SEC53  | UFD1   |      |
| CAGL0A04543g                         | CAGL0G01122g | CAGL0J00363g | CAGL0L03223g | CAGL0M14091g | ERG20 | HFD1  | PCK1   | SET1   | UGP1   |      |
| CAGL0A04829g                         | CAGL0G03861g | CAGL0J00451g | CAGL0L06864g | CDR1         | ERG25 | HSC82 | PDC    | SHM2   | UPC2A  |      |
| CAGL0B01078g                         | CAGL0G05269g | CAGL0J00891g | CAGL0L07678g | CTA1         | ERG26 | HSP12 | PDH1   | SLG1   | UPC2B  |      |
| CAGL0B01969g                         | CAGL0G06468g | CAGL0J07502g | CAGL0L08338g | ECM4         | ERG27 | HSP31 | PDR1   | SNQ2   | VPH2   |      |
| CAGL0B02343g                         | CAGL0G07271g | CAGL0K02563g | CAGL0L10186g | ENO1         | FCY1  | IFA38 | PDR12  | SPE3   | YBT1   |      |

**Supplementary Table S2.** Sequencing and post-sequencing parameters of whole-genome sequencing in this study

| Isolate no. | Sequencing parameter |                |                            |          | Post-sequencing parameter |                   |                  |                    |          |
|-------------|----------------------|----------------|----------------------------|----------|---------------------------|-------------------|------------------|--------------------|----------|
|             | Total yield (Gb)     | Cluster PF (%) | Cluster count PF (million) | ≥Q30 (%) | Total reads               | Trimming rate (%) | Mapping rate (%) | Duplicate rate (%) | Coverage |
| 1           | 8.42                 | 90.29 ± 0.73   | 26.81                      | 93.57    | 5,172,324                 | 0.07              | 98.2             | 0.05               | 60.6X    |
| 2           |                      |                |                            |          | 5,265,030                 | 0.05              | 98.5             | 0.04               | 62.1X    |
| 3           |                      |                |                            |          | 5,979,756                 | 0.06              | 98.7             | 0.04               | 70.8X    |
| 4           |                      |                |                            |          | 5,349,312                 | 0.05              | 98.3             | 0.05               | 62.8X    |
| 5           |                      |                |                            |          | 4,772,064                 | 0.06              | 98.6             | 0.03               | 56.4X    |
| 6           |                      |                |                            |          | 5,394,634                 | 0.05              | 98.6             | 0.04               | 63.8X    |
| 7           |                      |                |                            |          | 4,684,438                 | 0.05              | 98.6             | 0.04               | 55.4X    |
| 8           |                      |                |                            |          | 5,841,744                 | 0.05              | 98.7             | 0.04               | 69.1X    |
| 9           |                      |                |                            |          | 4,739,146                 | 0.04              | 98.7             | 0.04               | 56.1X    |
| 10          |                      |                |                            |          | 5,026,660                 | 0.06              | 98.6             | 0.04               | 59.3X    |
| Average     | 8.42                 | 90.29 ± 0.73   | 26.81                      | 93.57    | 5,222,511                 | 0.05              | 98.6             | 0.04               | 61.6X    |

Abbreviations: PF, passing filter.

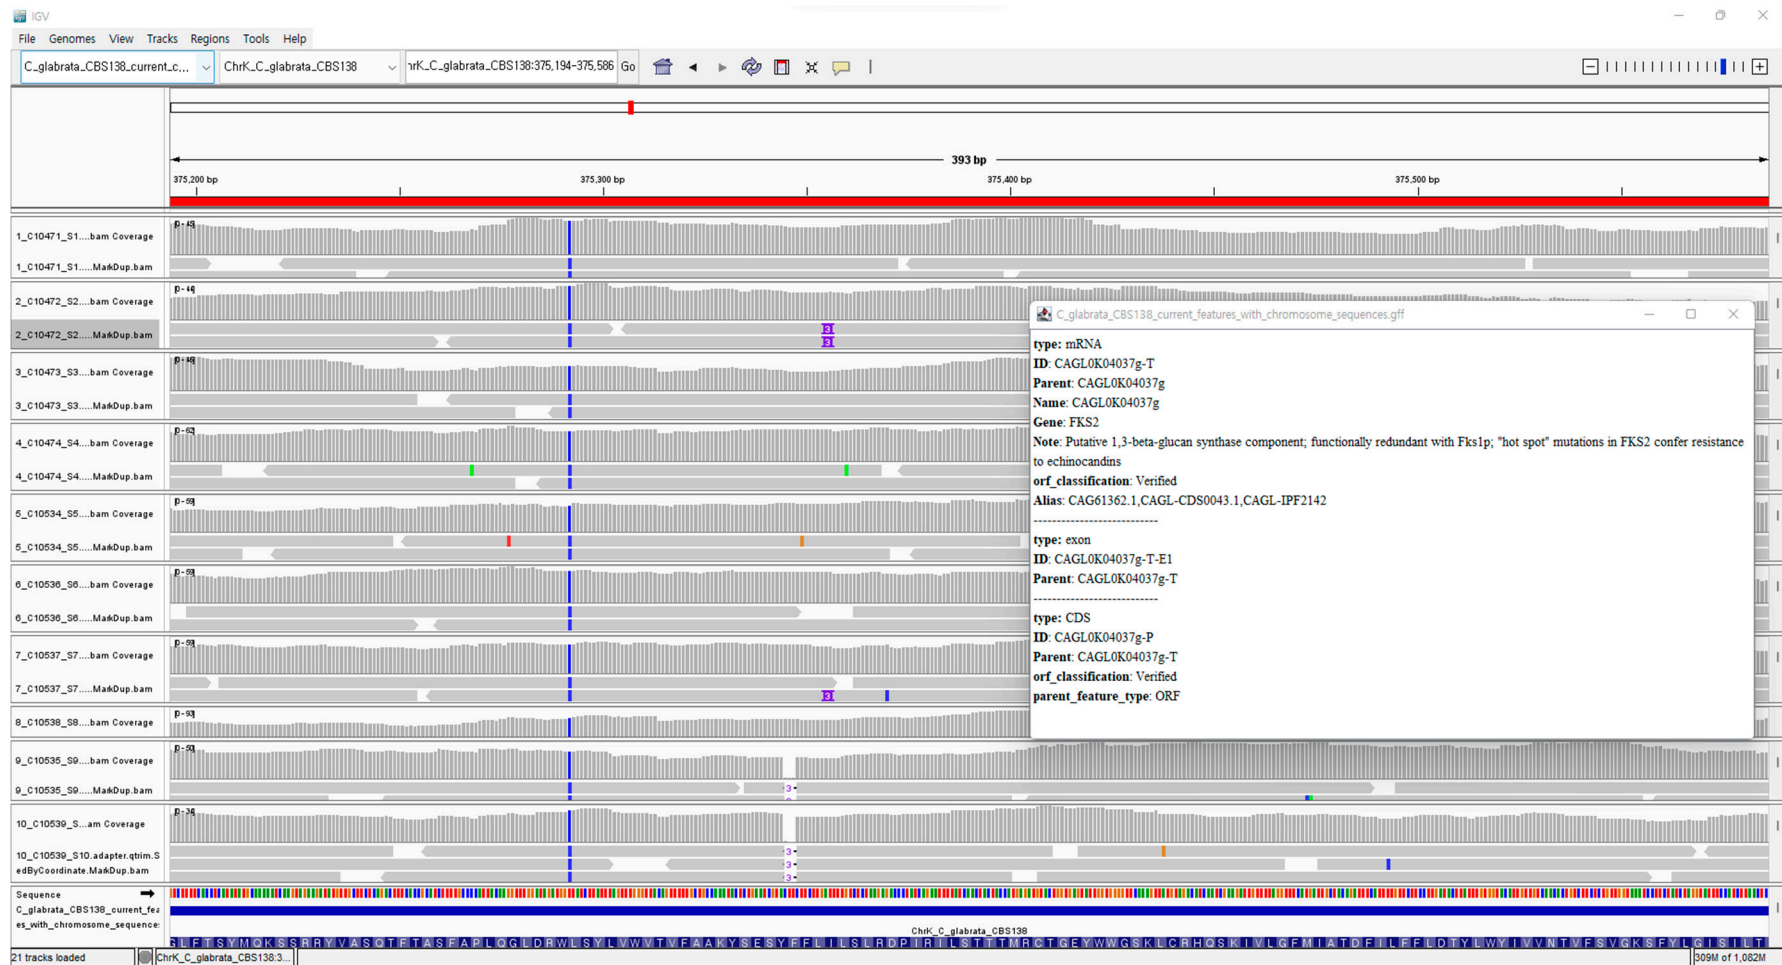

**Supplementary Figure S1.** An example of Integrative Genomics Viewer showing mutations on *FKS2* for 10 serial isolates of *C. glabrata*.

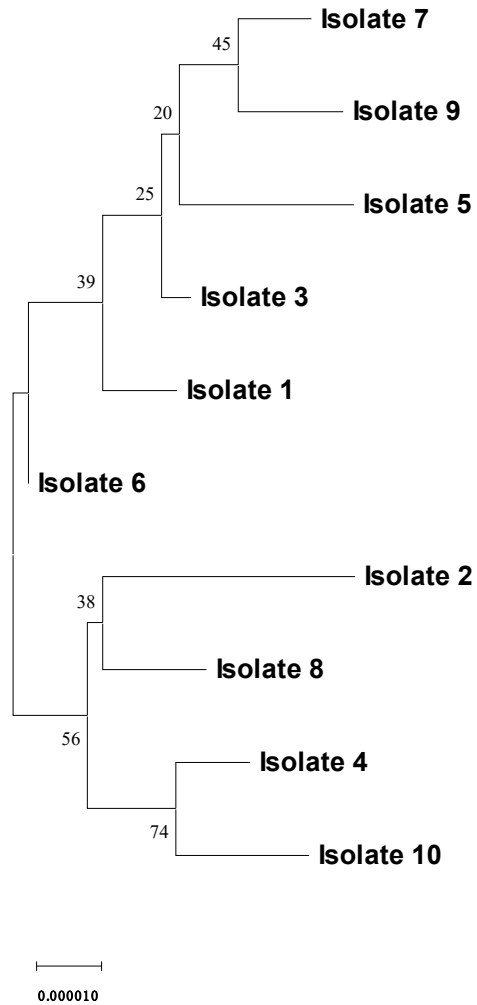

**Supplementary Figure S2.** Phylogenetic analysis of 10 serial *C. glabrata* isolates using SNP data for 182 resistance genes. Scale bar, number of nucleotide substitutions per site; numbers on nodes, bootstrap resampling values.
